# Supplementary material for: Biocontainment strategies for in vivo applications of Saccharomyces boulardii
Source: PubMed Central journal article supplement (PMC9986445; doi:10.3389/fbioe.2023.1136095), 2023-02-20
Supplement: DataSheet1.pdf [file DataSheet1.pdf]

## Supplementary Material

### Biocontainment strategies for *in vivo* applications of *Saccharomyces boulardii*

Karl Alex Hedin, Vibeke Kruse, Ruben Vazquez-Urbe\*, Morten Otto Alexander Sommer\*

\*Corresponding authors

Morten Otto Alexander Sommer ([msom@bio.dtu.dk](mailto:msom@bio.dtu.dk))

Ruben Vazquez-Urbe ([ruvas@biosustain.dtu.dk](mailto:ruvas@biosustain.dtu.dk))

## Supplementary Figures and Tables

### Supplementary Figures

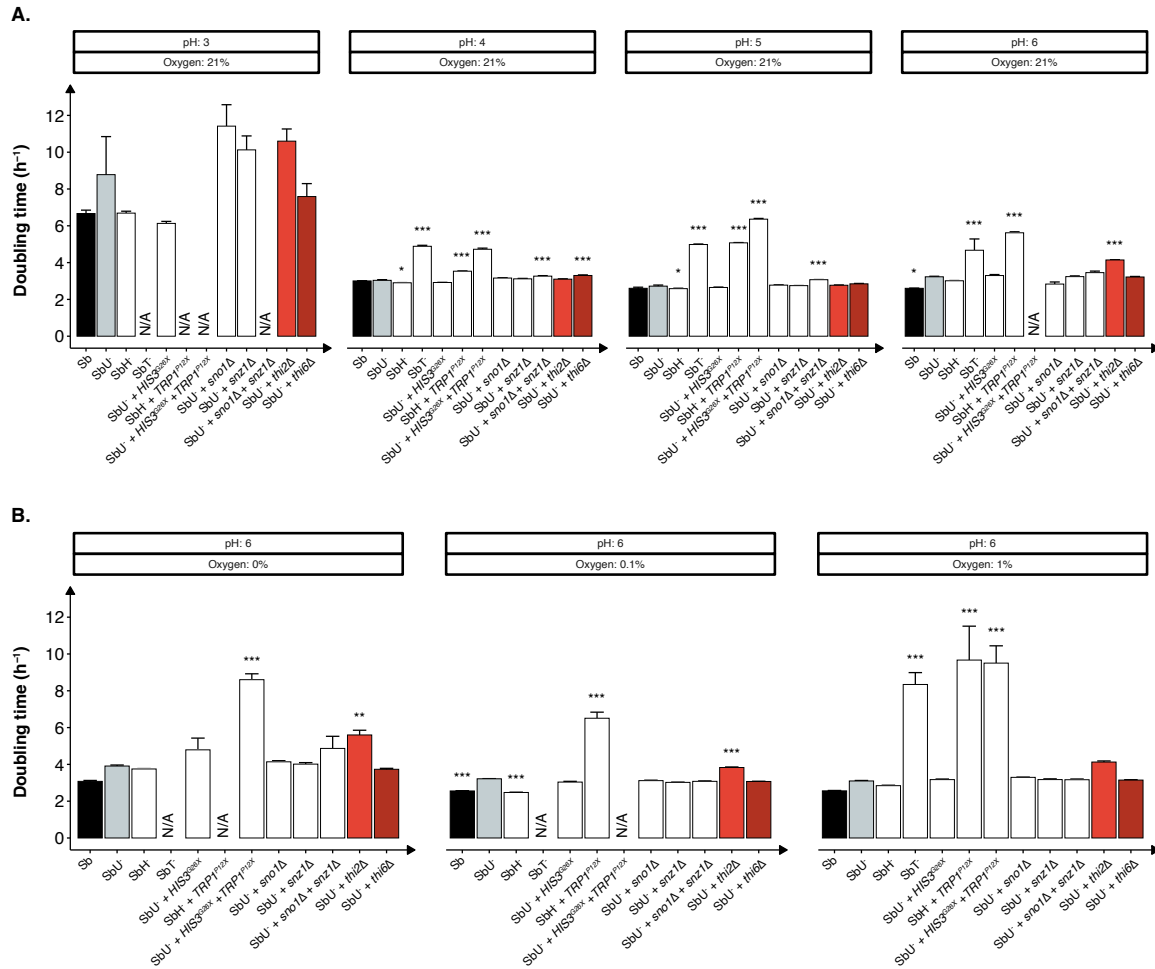

**Supplementary Figure S1. Growth characterisation of different auxotrophic strains of *S. boulardii*.** (A) Bar plot of the mean doubling time ( $\text{h}^{-1}$ ) in pH 3, 4, 5 and 6 at aerobic cultivation. (B) Bar plot of the mean doubling time ( $\text{h}^{-1}$ ) under anaerobic (0 %) and microaerobic (0.1 % and 1 %) at pH 6. Data presented as mean + SEM ( $n = 3$ ). One-way ANOVA, Dunnett's post hoc test with *Sb URA3<sup>S81X</sup>* as reference.

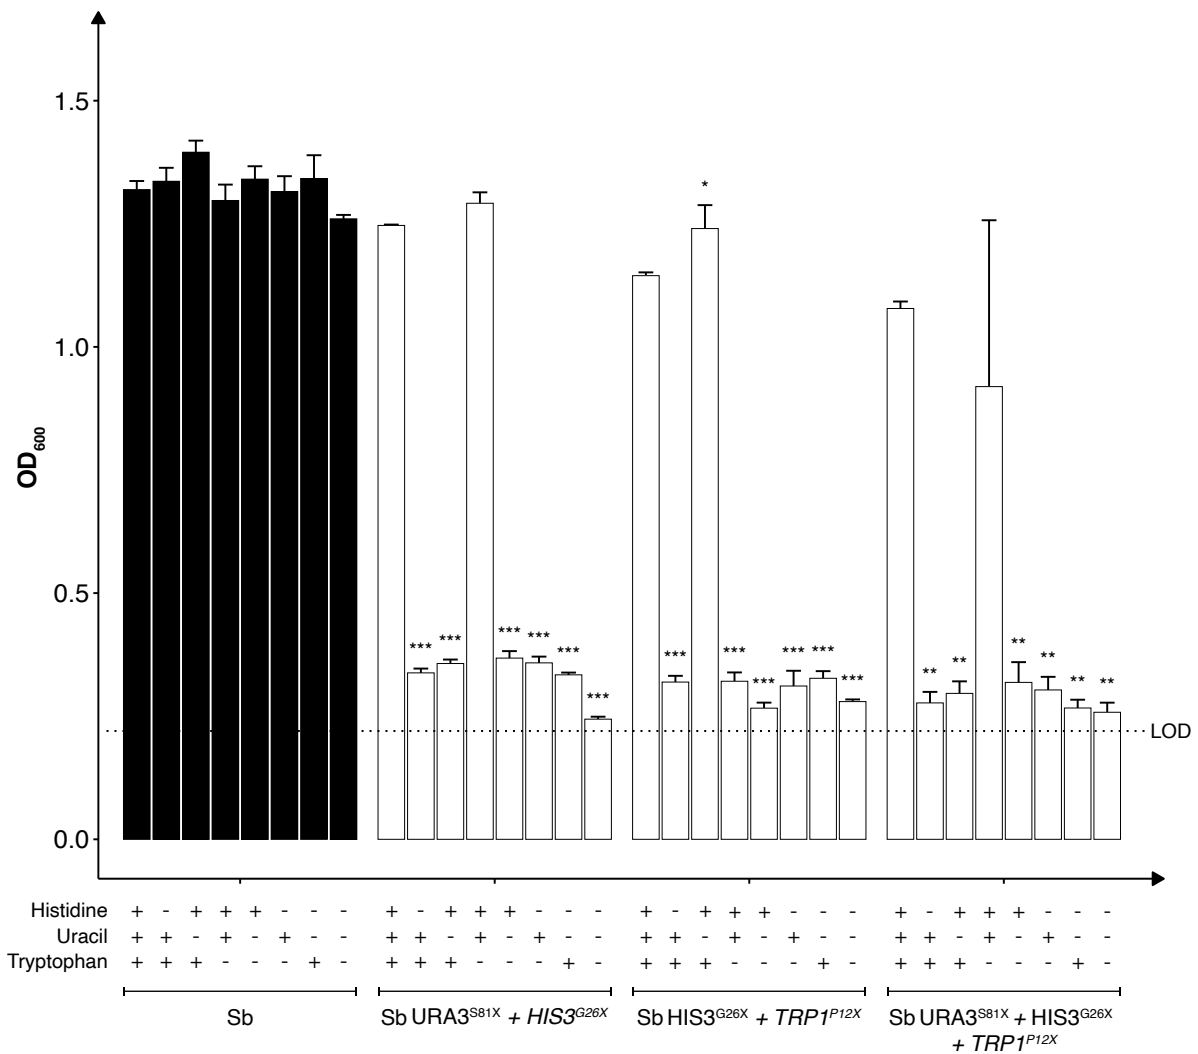

**Figure S2. Growth characterisation of double and triple gene disruptions *S. boulardii*.** Bar plot of mean OD<sub>600</sub> after 120 hours with and without the required nutrition supplemented. Limit of detection (LOD). Data presented as mean + SEM (n = 3). \* p < 0.05, \*\* p < 0.01 and \*\*\* p < 0.001. One-way ANOVA, Dunnett's post hoc test for each strain with fully supplemented media as reference.

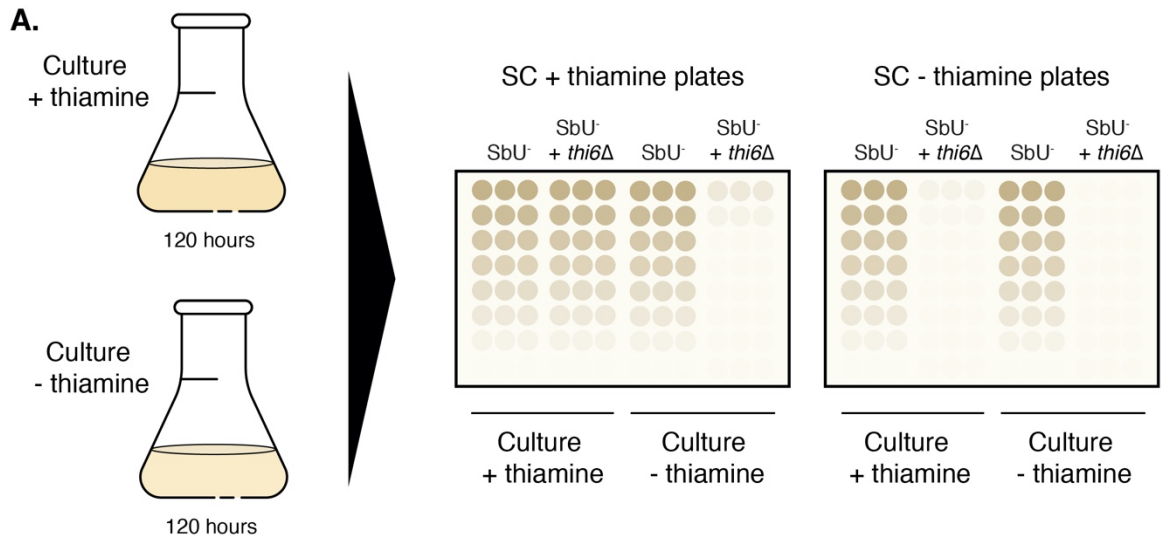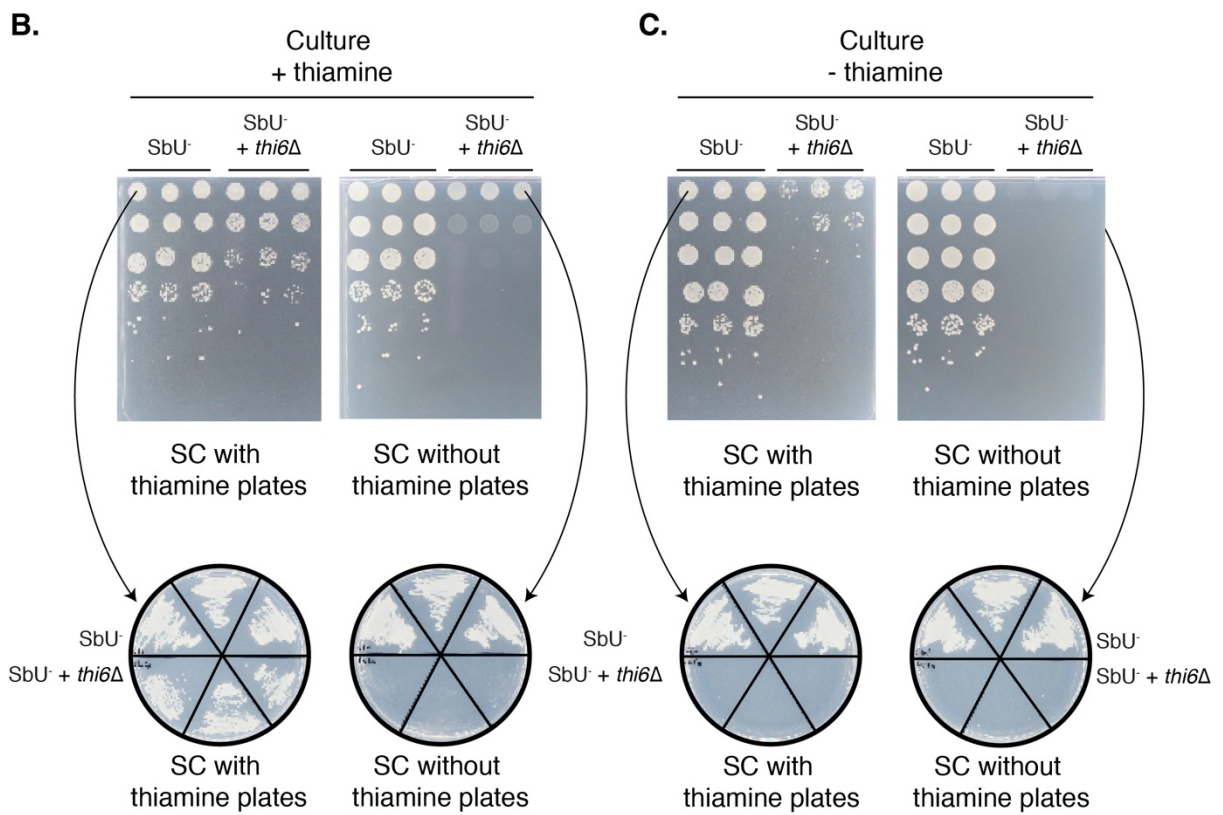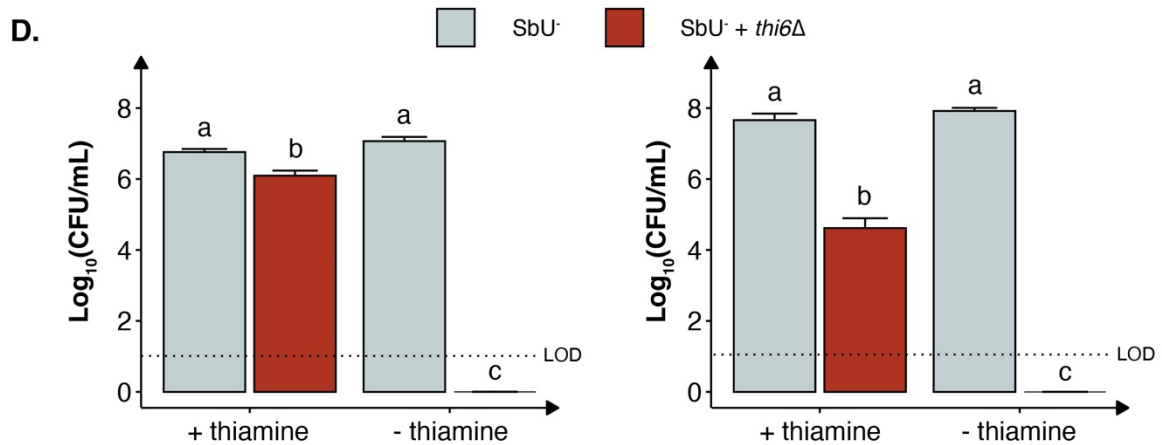

**Supplementary Figure S3. Escape rate assay of the *thi6*Δ *S. boulardii* strain.** (A) Graphical illustration of the experimental design. The *S. boulardii* strains were cultivated for 120 hours in SC with (400 μg/mL) and without thiamine at 37°C. The cultures were spun down and resuspended in 500 μL and spotted on SC plates with and without thiamine. All plates were incubated for 72 hours at 37°C. (B) The serial dilution and re-streak of SbU<sup>-</sup> and SbU<sup>-</sup> + *thi6*Δ cultivated in SC with 400 μg/mL thiamine. (C) The serial dilution and re-streak of SbU<sup>-</sup> and SbU<sup>-</sup> + *thi6*Δ cultivated in SC without thiamine. Grown biomass from the undiluted samples were spread out on fresh selection plates to verify potential escapers. (D) The log<sub>10</sub> CFU/mL from the serial dilution spotting. Data presented as mean + SEM (n = 3). Two-way ANOVA, Tukey post hoc test. The different letters (a, b, and c) above the bars indicate statistically different groups (significance level at p < 0.05)

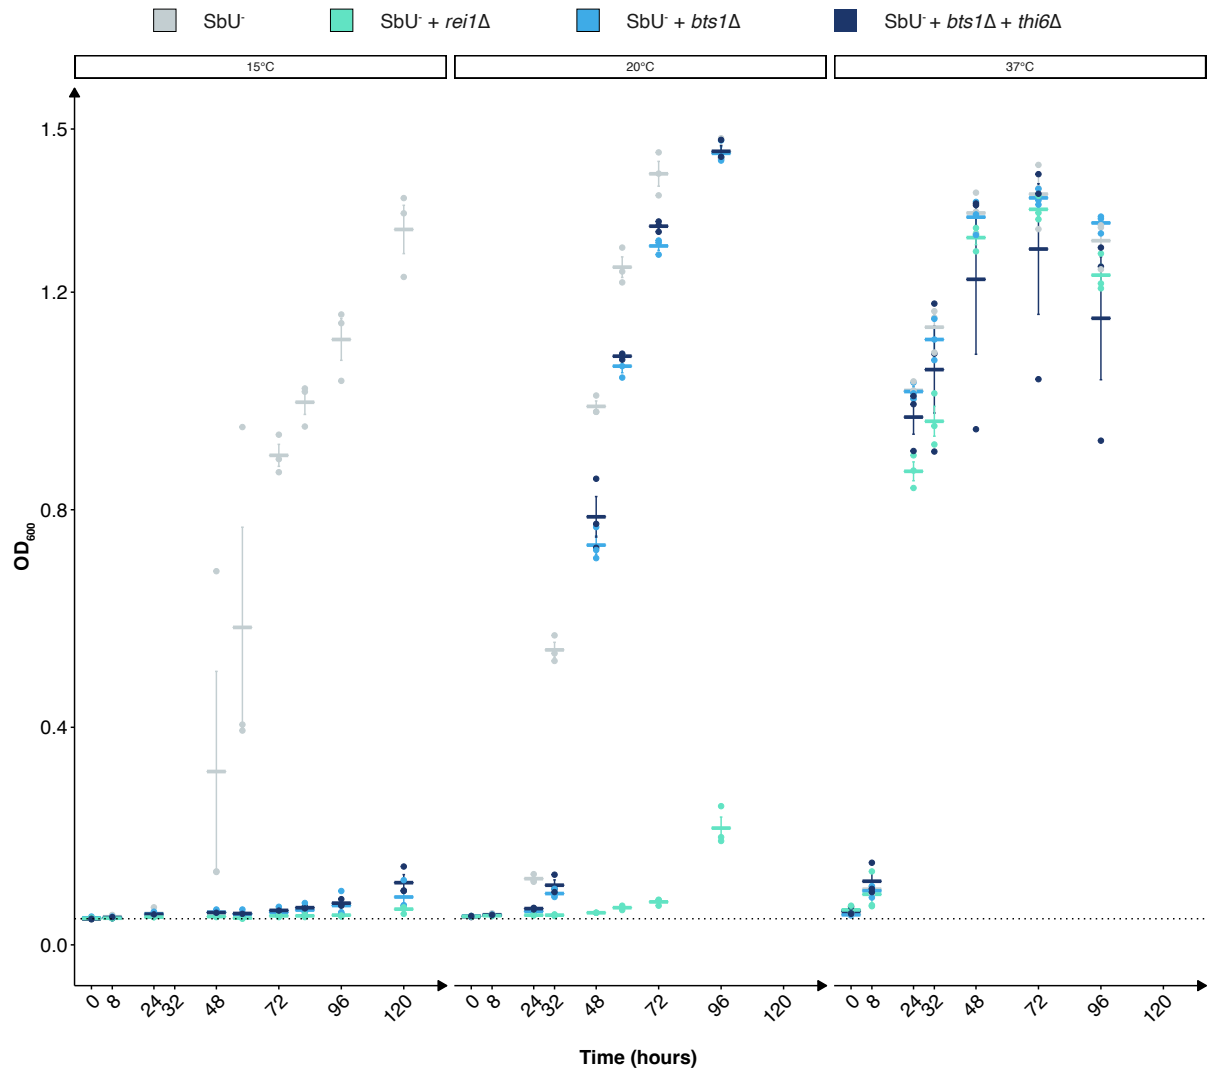

**Supplementary Figure S4. Growth performance of the cold-sensitive strains at different temperature.** The mean OD<sub>600</sub> over time at different temperature (15 °C, 20 °C and 37 °C). Data presented as mean ± SEM (n =3). Each point represents a biological replicate.

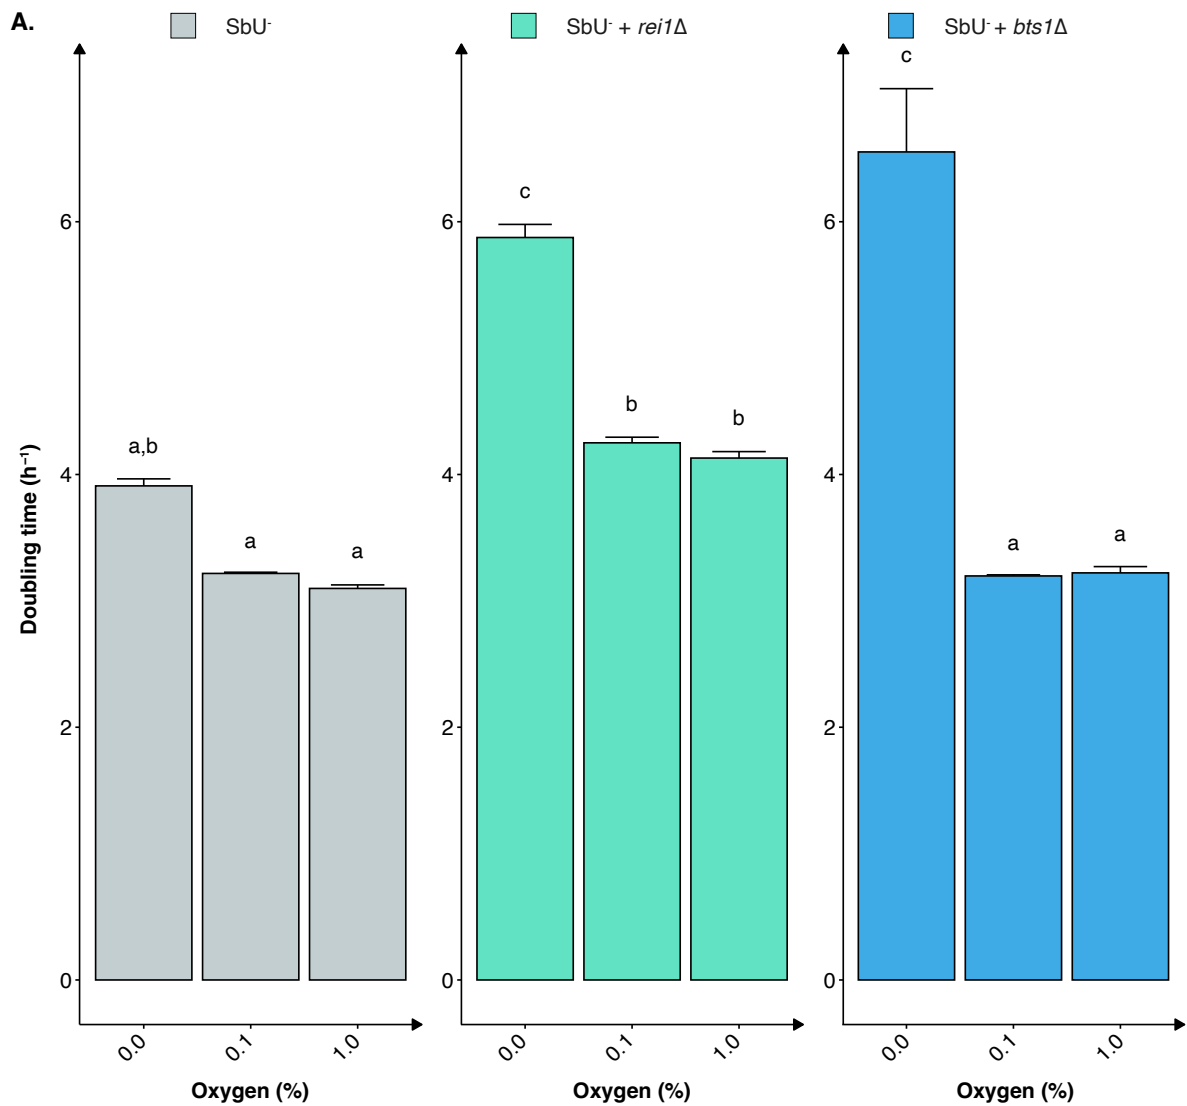

**Supplementary Figure S5. Growth characterisation of the cold-sensitive strains at different oxygen concentration. (A)** Bar plot of the mean doubling time (h<sup>-1</sup>) under anaerobic (0 %) and microaerobic (0.1 % and 1 %) at pH 6. Data presented as mean + SEM (n = 3). Two-way ANOVA, Tukey post hoc test. The different letters (a, b, and c) above the bars indicate statistically different groups (significance level at p < 0.05)

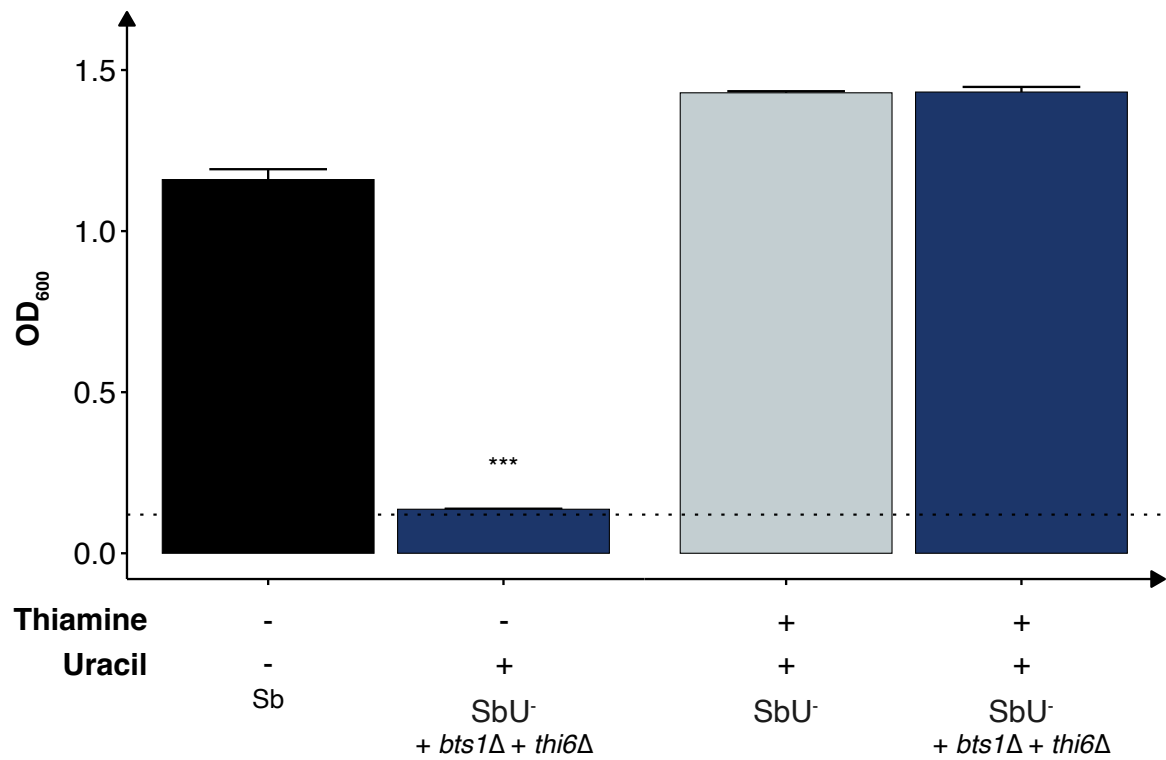

**Supplementary Figure S6. Characterisation of the combined biocontainment strain.** Bar plot of the mean OD<sub>600</sub> after 48 hours with (+) and without (-) thiamine supplemented at 37°C. Data presented as mean + SEM (n = 3). \* p < 0.05, \*\* p < 0.01 and \*\*\* p < 0.001. One-way ANOVA, Dunnett's post hoc test with SbU<sup>-</sup> as reference.



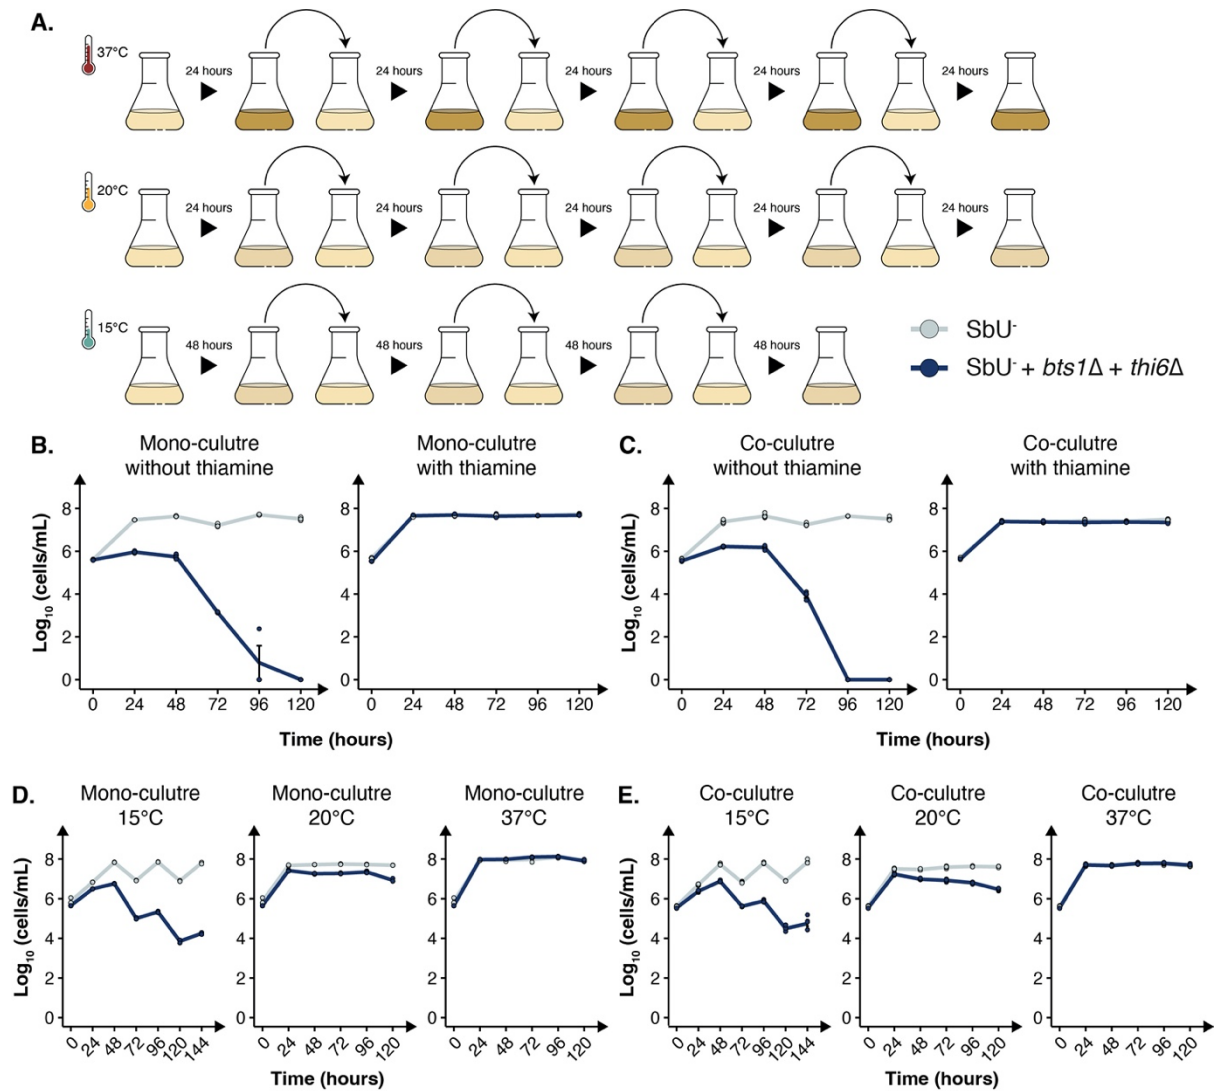

**Supplementary Figure S7. Growth characterisation of the combined biocontainment strain in mono-culture and co-culture at different condition. (A)** Graphical illustration of the experimental design.  $SbU^-$  and  $SbU^- + bts1\Delta + thi6\Delta$  were inoculated 1:1 in a culture. **(B)**  $\text{Log}_{10}$  cells/mL of  $SbU^-$  and  $SbU^- + bts1\Delta + thi6\Delta$  in a mono-culture and co-culture with each other in media with and without thiamine. The culture was diluted 1:100 every 48<sup>th</sup> hour for a total period of 96 hours ( $n = 3$ ). **(C)**  $\text{Log}_{10}$  cells/mL of  $SbU^-$  and  $SbU^- + bts1\Delta + thi6\Delta$  in a mono-culture and co-culture with each other at 15°C, 20°C, and 37°C. The culture was diluted 1:100 every 24<sup>th</sup> hour for a total period of 120 hours for cultures at 20°C and 37°C, and 48<sup>th</sup> hour for a total period of 144 hours for cultures at 15°C ( $n = 5$ ). Data presented as mean  $\pm$  SEM.

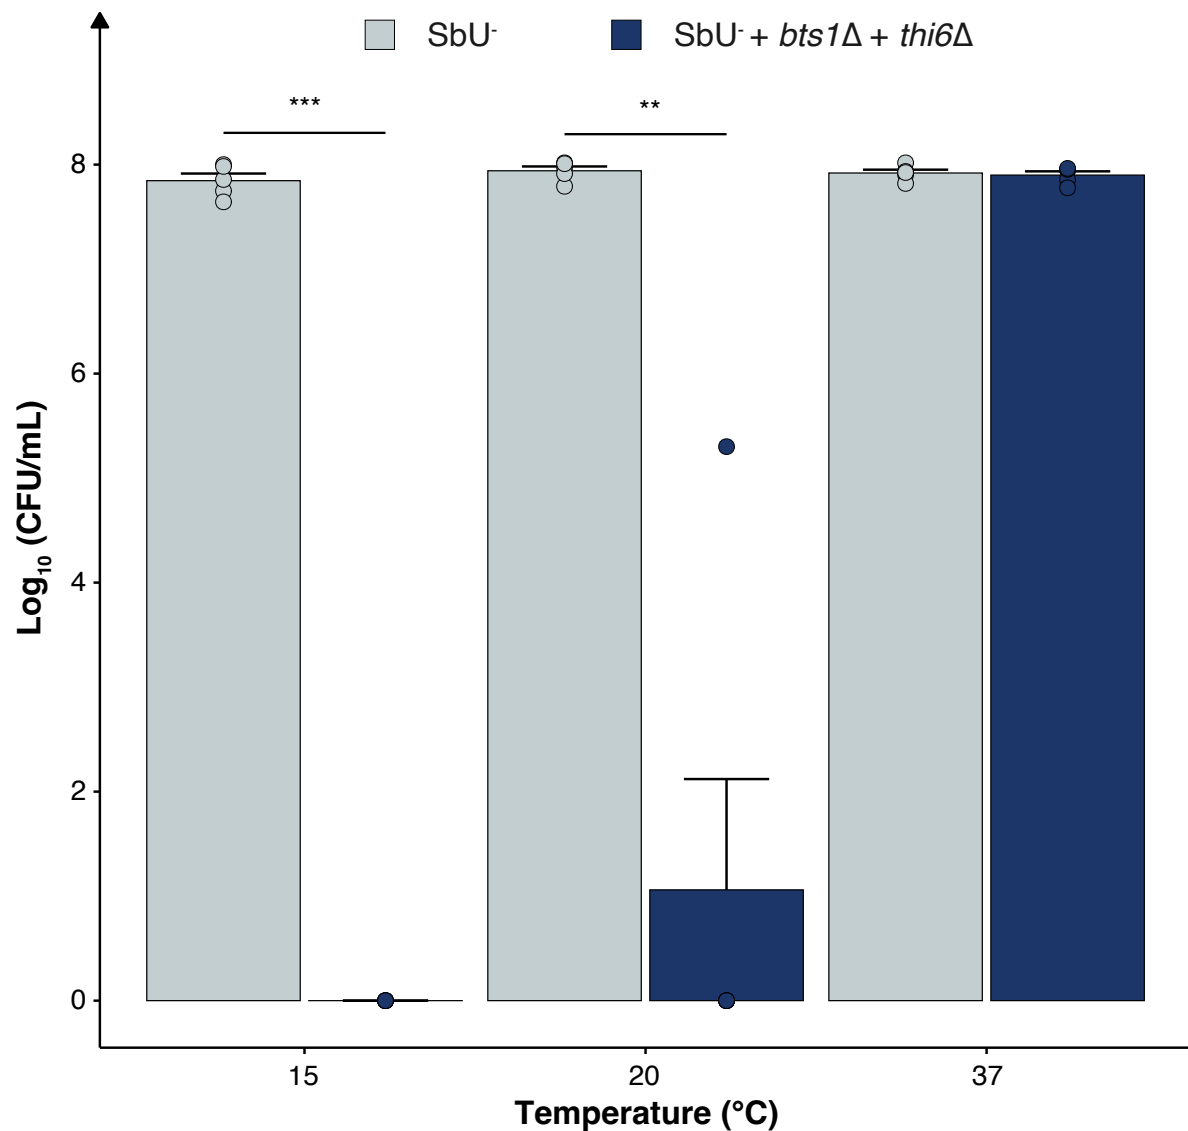

**Supplementary Figure S8. Survival assay of the combined biocontainment strain.** Log<sub>10</sub> CFU/mL of SbU<sup>-</sup> and SbU<sup>+</sup> + *bts1*Δ + *thi6*Δ from a 120 hour co-culture at 37°C that was plated and incubated at 15°C, 20°C, and 37°C for 144, 96 and 48 hours, respectively. Data presented as mean + SEM (n = 5). \* p < 0.05, \*\* p < 0.01 \*\*\* p < 0.001. Data was analysed with dependent sample t-test with Bonferroni adjustment for multiple comparisons.

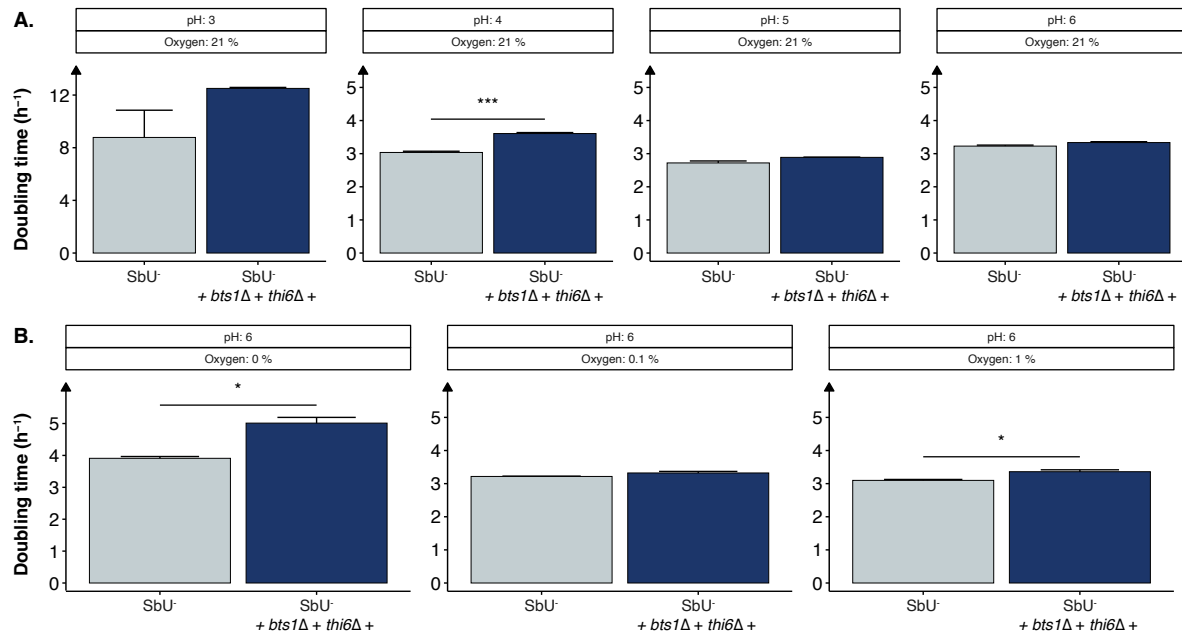

**Supplementary Figure S9. Growth characterisation of the multi-layered biocontainment strain.** (A) Bar plot of the mean doubling time (h<sup>-1</sup>) in pH 3, 4, 5 and 6 at aerobic cultivation. (B) Bar plot of the mean doubling time (h<sup>-1</sup>) under anaerobic (0 %) and microaerobic (0.1 % and 1 %) at pH 6. Data presented as mean + SEM (n = 3). \* p < 0.05, \*\* p < 0.01 \*\*\* p < 0.001. All samples analysed with dependent sample t-test.

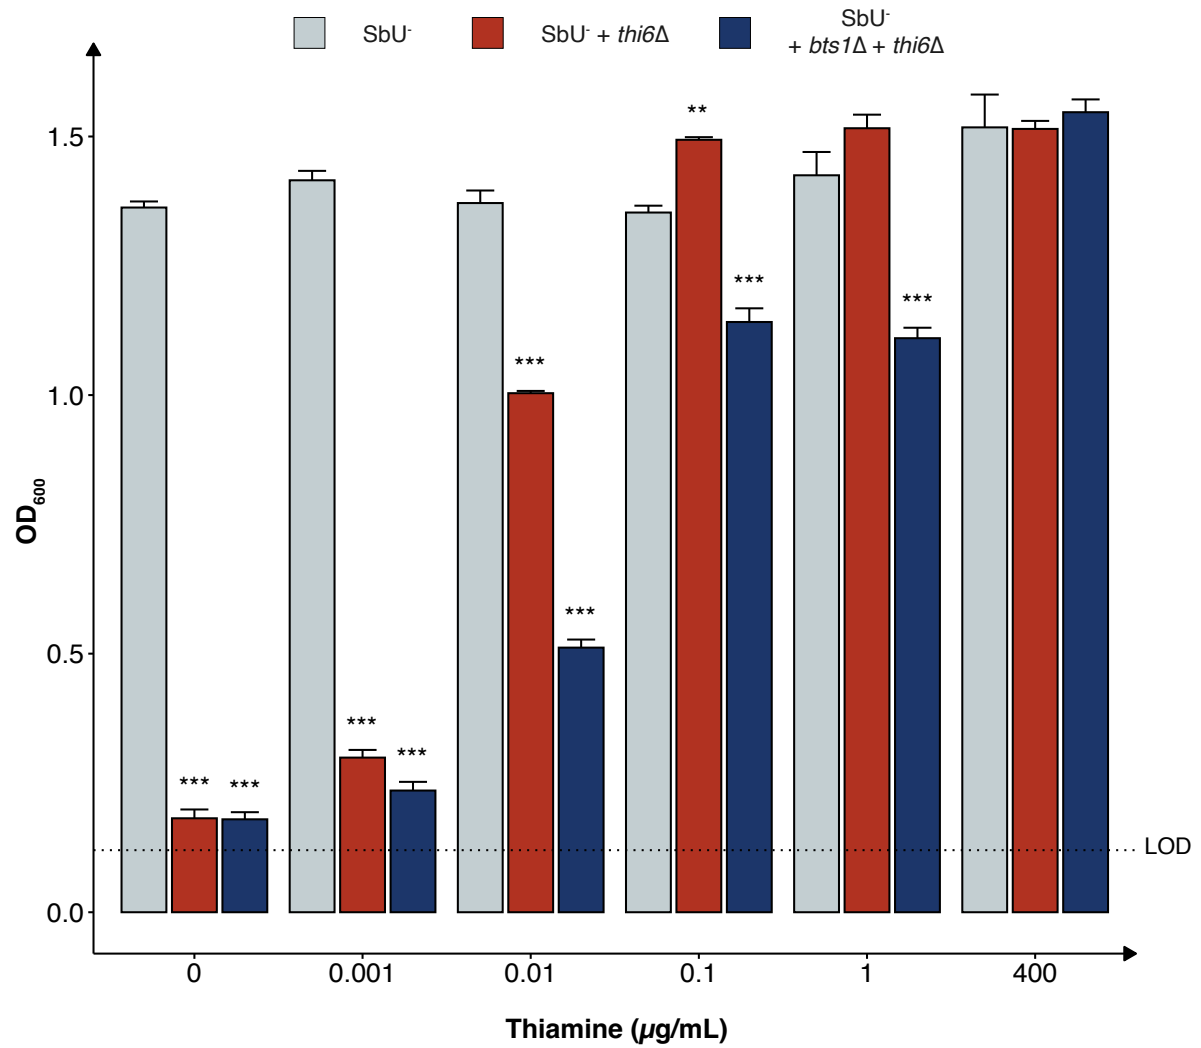

**Supplementary Figure S10. Growth characterisation of the multi-layered biocontainment strain at different thiamine concentration. (A)** Bar plot of mean OD<sub>600</sub> after 48 hours under different concentrations of thiamine. Limit of detection (LOD). Data presented as mean + SEM (n = 3). \* p < 0.05, \*\* p < 0.01 \*\*\* p < 0.001. All samples are analysed by One-way ANOVA, Dunnett's post hoc test with SbU<sup>-</sup> as reference.

## Supplementary Tables

**Supplementary Table S1. Primers used in this study**

| Primer           | Sequence                                                                                                                       | Reference               |
|------------------|--------------------------------------------------------------------------------------------------------------------------------|-------------------------|
| pCfB2312-gRNA_fw | atacgaagttatattaaggggtg                                                                                                        | This study              |
| pCfB2312-gRNA_rv | taggcgtatcacgagat                                                                                                              | This study              |
| pCfB2312_fw      | aagcttcagctgacgcgat                                                                                                            | This study              |
| pCfB2312-rv      | tgcaggtcgacaacccttaa                                                                                                           | This study              |
| URA3repair_fw    | tccatggagggcacagttaagccgctaaaggcattataagccaagt<br>acaatttttactc                                                                | (Zhang et al.,<br>2014) |
| URA3repair_rv    | accaatgtcagcaaatcttctgtcttcgaagagtaaaaattgtacttg<br>gcttataatgc                                                                | (Zhang et al.,<br>2014) |
| HIS3repair_fw    | gtaaagcgtattacaaatgaaaccaagattcagattgcatctcttta<br>aagggtaaccc                                                                 | (Zhang et al.,<br>2014) |
| HIS3repair_rv    | ttctgggaagatcgagtgctctatcgctaggggtaaccctttaaga<br>gatcgcaatctg                                                                 | (Zhang et al.,<br>2014) |
| TRP1repair_fw    | tccgatgctgacttgctgggtattatgtgtgtaaaatagaaagaga<br>acaattgacccg                                                                 | (Zhang et al.,<br>2014) |
| TRP1repair_rv    | tacaagacttgaaatttccttgaataaccgggtcaattgtctctttct<br>atttacac                                                                   | (Zhang et al.,<br>2014) |
| URA3dg-fw        | cttgcattgacaattctgcta                                                                                                          | This study              |
| URA3dg-rv        | ttcttaaccaactgcacag                                                                                                            | This study              |
| HIS3dg-fw        | aaagatctaccaccgctctg                                                                                                           | This study              |
| HIS3dg-rv        | gcgattggcattatcacata                                                                                                           | This study              |
| TRP1dg-fw        | gccgattaagaattcggctcg                                                                                                          | This study              |
| TRP1dg-rv        | gcactgagtagtatgttgcag                                                                                                          | This study              |
| BTS1dg_fw        | aaatcgcgaaattaccggcg                                                                                                           | This study              |
| BTS1dg_rv        | gccgccatctctactcactc                                                                                                           | This study              |
| BTS1repair_fw    | tcattttcaaagaagctactaataagaagagaacaaagcgtttacga<br>gtctggaaaatcaataaattgatcaatcaaatagtgagggaagat<br>agtcagaaataaagccttctctcctc | This study              |
| BTS1repair_rv    | gaggagagaaggctttatttctgactatcttctccactaatttgattga<br>tcaatttatttgattttccagactcgtaaacgctttgtctctttctattagt<br>agcttctttgaaaatga | This study              |
| REI1dg_fw        | ttgattcgtgcctgttgcg                                                                                                            | This study              |
| REI1dg_rv        | cccgatattccccgtgactc                                                                                                           | This study              |
| REI1repair_fw    | tacaggttatgagatgcttctcattagaagtcaagaagagagcatatc<br>agtaacaatacgttctttttgcactacttttttagtattttgtcgcataat<br>actgcttcaccattgtac  | This study              |

|               |                                                                                                                                  |            |
|---------------|----------------------------------------------------------------------------------------------------------------------------------|------------|
| REI1repair_rv | gtacaaatggtgaagcagtatatatgcgacaaaataactaaaaaaagt<br>agtgcAAAagaacgtattgttactgatatgctctcttcttgacttctaa<br>tgagaagcatctcataacctgta | This study |
| SNZ1dg_fw     | agctttaccctggaagcacc                                                                                                             | This study |
| SNZ1dg_rv     | ggacgctgagagctatggac                                                                                                             | This study |
| SNZ1repair_fw | agaaacctttaggaacgactagcaaatatacacagtactaatattca<br>gttaattatcacgtttcttgaacaggtatTTTgagcattataaacactTTT<br>ccccctcaactttgtattac   | This study |
| SNZ1repair_rv | gtaatacaaagttgaggggggaaaaagtgtataatgctcaaaatac<br>ctgttcaaagaaacgtgataattaactgaatattagtactgtgtatatt<br>gctagtcgTtctaaggTtct      | This study |
| SNO1dg_fw     | ccttacccttgcggctgag                                                                                                              | This study |
| SNO1dg_rv     | aagggcctgcggaagatcac                                                                                                             | This study |
| SNO1repair_fw | aggTttttttcttattatttcatttcgttaaatagaaagaaaaacatat<br>cttaaagtaataaccgccgTttccacattttatattacaaaacctga<br>gagatttttcacatcga        | This study |
| SNO1repair_rv | tcgatgtgaaaaatctctcaggTtttgtaataataaaaatgtggaaa<br>accggcggtattactttaagatatgTttttcttctatttaacgaaatga<br>aataataagaaaaaaaacct     | This study |
| THI2repair_fw | tttccattcattccaccagTatatatagcctatatatatatccgcact<br>agaaccaagcttattgagcctccctcactcattcaagaaaaaaa<br>agccaaaagctttgcttggga        | This study |
| THI2repair_rv | tccaagcaaagctttggctttttttcttgaatgagtgaagggaag<br>gctcaataagcttggttctagtgcggatatatatataggctatatatata<br>cgtggtgaaatgaaatgaaaa     | This study |
| THI2_dg fw    | tacaatggcagccctcttgg                                                                                                             | This study |
| THI2_dg rv    | ccctggcagataggaaacct                                                                                                             | This study |
| THI6repair_fw | aaccatggttctcaagaccaaatacactctgaagctaaattatttaaatac<br>aaacagcggaaactatttacaacgtaataatttataaactgattaata<br>aaggaagaaagcccaaaaatt | This study |
| THI6repair_rv | aatttttgggctttctcctatttaatacagttataaaatcattacgttgt<br>aaatagttccgctgTttgatttaataatttagcttcagagtgatttggT<br>cttgagaacctggtt       | This study |
| THI6_dg fw    | tccgtttctagetgcaggtc                                                                                                             | This study |
| THI6_dg rv    | agtttgtcctcctgggggtg                                                                                                             | This study |
| pCfB3050_fw   | cttcgctattacgccagctg                                                                                                             | This study |
| pCfB3050_rv   | ccgattcattaatgcagctg                                                                                                             | This study |

**Supplementary Table S2. Plasmids used in this study**

| <b>Plasmid name</b> | <b>Genotype</b>                                                            | <b>Marker<br/>(<i>E. coli</i> / <i>S. boulardii</i>)</b> | <b>Reference</b>            |
|---------------------|----------------------------------------------------------------------------|----------------------------------------------------------|-----------------------------|
| pCfB2312            | CEN6_ARS4 Amp P <sub>TEF1</sub> -Cas9- <i>t<sub>CYCI</sub></i> kanMX       | Amp / KanMX                                              | (Jessop-Fabre et al., 2016) |
| pCfB2312-URA3       | pCfB2312; P <sub>SNR52</sub> -gRNA( <i>URA3</i> )- <i>t<sub>SUP4</sub></i> | Amp / KanMX                                              | This study                  |
| pCfB2312-HIS3       | pCfB2312; P <sub>SNR52</sub> -gRNA( <i>HIS3</i> )- <i>t<sub>SUP4</sub></i> | Amp / KanMX                                              | This study                  |
| pCfB2312-TRP1       | pCfB2312; P <sub>SNR52</sub> -gRNA( <i>TRP1</i> )- <i>t<sub>SUP4</sub></i> | Amp / KanMX                                              | This study                  |
| pCfB2909-Exe4       | pCfB2909: P <sub>TDH3</sub> -Exe4- <i>t<sub>DIT1</sub></i> **              | Amp                                                      | (Hedin et al., 2022)        |
| pCfB2909-GFP        | pCfB2909: P <sub>TDH3</sub> -GFP- <i>t<sub>ADH1</sub></i>                  | Amp                                                      | This study                  |
| pCfB2909-mKate      | pCfB2909: P <sub>TDH3</sub> -mKate- <i>t<sub>ADH1</sub></i>                | Amp                                                      | This study                  |
| pCfB3050 (URA3)     | pESC; P <sub>SNR52</sub> -gRNA( <i>XII-5</i> )- <i>t<sub>SUP4</sub></i>    | Amp / <i>URA3</i>                                        | This study                  |
| pCfB3050-THI2       | pESC; P <sub>SNR52</sub> -gRNA( <i>THI2</i> )- <i>t<sub>SUP4</sub></i>     | Amp / <i>URA3</i>                                        | This study                  |
| pCfB3050-THI6       | pESC; P <sub>SNR52</sub> -gRNA( <i>THI6</i> )- <i>t<sub>SUP4</sub></i>     | Amp / <i>URA3</i>                                        | This study                  |
| pCfB3050-SNO1       | pESC; P <sub>SNR52</sub> -gRNA( <i>SNO1</i> )- <i>t<sub>SUP4</sub></i>     | Amp / <i>URA3</i>                                        | This study                  |
| pCfB3050-SNZ1       | pESC; P <sub>SNR52</sub> -gRNA( <i>SNZ1</i> )- <i>t<sub>SUP4</sub></i>     | Amp / <i>URA3</i>                                        | This study                  |
| pCfB3050-BTS1       | pESC; P <sub>SNR52</sub> -gRNA( <i>BTS1</i> )- <i>t<sub>SUP4</sub></i>     | Amp / <i>URA3</i>                                        | This study                  |
| pCfB3050-REI1       | pESC; P <sub>SNR52</sub> -gRNA( <i>REI1</i> )- <i>t<sub>SUP4</sub></i>     | Amp / <i>URA3</i>                                        | This study                  |

**Supplementary Table S3. Construct sequences used in this study**

| Name                    | Sequence                                                                                                                                                                                                                                                                                                                                                                                                                                                                                                                                                                                                                                                                                                                                                         | Reference(s) |
|-------------------------|------------------------------------------------------------------------------------------------------------------------------------------------------------------------------------------------------------------------------------------------------------------------------------------------------------------------------------------------------------------------------------------------------------------------------------------------------------------------------------------------------------------------------------------------------------------------------------------------------------------------------------------------------------------------------------------------------------------------------------------------------------------|--------------|
| <i>P<sub>TDH3</sub></i> | cagttcgagtttatcattatcaactgccattcaagaatacgtaaataattaa<br>tagtagtgatttcctaactttatttagtcaaaaaattggcctttaattctgctgta<br>acccgtagcatgccccaaatagggggcgggttacacagaatataaacatcat<br>aggtgtctgggtgaacagtttattcctggcatccactaaatataatggagccc<br>gcttttaagctggcatccagaaaaaaaaagaatcccagcaccaaaatattgt<br>tttctcacaacctcagttcataggtccattctcttagcgcaactacacagaa<br>caggggcacaaacaggcaaaaaacgggcacaacctcaatggagtgatgc<br>aacctgctggagtaaatgatgacacaaggcaattgacctacgcatgtatcta<br>tctcattttctacaccttattaccttctgctctctctgattggaaaaagctgaa<br>aaaaaaggtgaaaccagttccctgaaattattccctatttgactaataagtat<br>ataagacggtaggtattgattgtaattctgtaaatctatttctaaactcttaaa<br>ttctactttatagttagcttttttagtttaaacactaagaacttagttcgaat<br>aaacacacataaacaacaaa                                     | This study   |
| <i>t<sub>ADHI</sub></i> | gtagatacgttgtagacttctaaataagcgaatttctatgatttatgattttat<br>tattaataagttataaaaaataagtgatatacaattttaaagtgactcttagg<br>ttttaaacgaaaattctattcttgagtaactcttctctgtaggtcaggtgcttctc<br>tcaggtatagcatgaggtcgcctc                                                                                                                                                                                                                                                                                                                                                                                                                                                                                                                                                          | This study   |
| mKate                   | atggttctgaactcatcaaggaaaacatgcacatgaaactttacatggaagg<br>tactgtgaacaatcatcttttaagtgtacatccgagggtgaaggcaaacctta<br>cgaaggaaactcaactatgagaattaaagctgtagaaggtggaccattacct<br>ttgcatgtgatcttgcaacatcattcatgtatgggagcaagacattcataa<br>accatactcaaggatataccagacttttcaaacagagtttccagagggttttac<br>atgggaaagagtaacaacgtacgaggatggaggtgtattgacagccactca<br>agacacatcactcaagatgggtgttaatctacaatgcaagattagaggcg<br>tcaatttcccttcaatgggtccagttatgcagaaaaagacattaggctgggaa<br>gctcaaccgaaacctgtacctgctgatgggtggcctagaaggcagagct<br>gacatggcccttaactggttgggtggaggcatctaatctgcaatttgaaaac<br>cacttatcgttctaaaaagccagccaaaaacctaaagatgccagggtgttact<br>acgtcgaccgaagattgaaaggattaaagaggctgataaagagacttatgt<br>tgaacaacacgaagtggcagtggttagatactgtgatttccatctaagttgg<br>gacacagataa | This study   |
| yEGFP                   | atgtctaaaggtgaagaattattcactgggtgtgtccaatthttggtgaattaga<br>tggtagtgaatggcacaattttctgctccggtgaagggtgaagggtgatgc<br>tacttacggtaaatgaccttaaaatttttactactggtaaattgccagttcc<br>atggccaaccttagtcactcttccggttatgggttcaatgttttgcgagatac<br>ccagatcatatgaacaacatgacttttcaagctgccatgccagaagggttat<br>gtcaagaaagaactatttttcaagatgacggtaactacaagaccagagc<br>tgaagtcaagttgaagggtgataccttagttaatagaatcgaattaaaaggtatt<br>gattttaaagaagatggttaacatttttaggtcacaattggaatacaactataact<br>ctcaaatgtttacatcatggctgacaaaacaaaagaatgggtatcaaagttact<br>tcaaaattagacacaacattgaagatggttctgttcaattagctgaccattatca                                                                                                                                                                         | This study   |



|           |                                                                                                                                                                                                                                                                                                                                                                                                                                                                                                                                                                                                                                                                                                                                                                                                                                                                                                                                                                                                                                                                                                                                                                                                                                                                                                                                                                                                                                                                          |                      |
|-----------|--------------------------------------------------------------------------------------------------------------------------------------------------------------------------------------------------------------------------------------------------------------------------------------------------------------------------------------------------------------------------------------------------------------------------------------------------------------------------------------------------------------------------------------------------------------------------------------------------------------------------------------------------------------------------------------------------------------------------------------------------------------------------------------------------------------------------------------------------------------------------------------------------------------------------------------------------------------------------------------------------------------------------------------------------------------------------------------------------------------------------------------------------------------------------------------------------------------------------------------------------------------------------------------------------------------------------------------------------------------------------------------------------------------------------------------------------------------------------|----------------------|
|           | <p>acaaaatactccaattggtgatggccagtcctgtaccagacaaccattactt<br/>atccactcaatctgccttatccaaagatccaaacgaaaagagagaccacatg<br/>gtctttagaattgttactgctgctggtattacccatggtatggatgaattgta<br/>caaatga</p>                                                                                                                                                                                                                                                                                                                                                                                                                                                                                                                                                                                                                                                                                                                                                                                                                                                                                                                                                                                                                                                                                                                                                                                                                                                                               |                      |
| Exendin-4 | <p>tctaccaacggaatgcgtgcgatcgcgtgcattccgagttatcattatcaata<br/>ctgccattcaagaatcgtaaataattaatagtagtgatttcctaactttattt<br/>agtcaaaaaattagccttttaattctgctgtaaccgtacatgccaaaaatagg<br/>ggcggggttacagaatataacatcgtaggtgctgggtgaacagtttat<br/>tctggcatccactaaatataatggagcccgttttaagctggcatccagaa<br/>aaaaaagaatcccagcaccaaaatattgtttcttcccaacctcagttcat<br/>aggccattctcttagcgaactacagagaacaggggcacaaacaggcaa<br/>aaaacgggcacaaacctcaatggagtgatgaacctgcctggagtaaagat<br/>gacacaaggcaattgaccacgatgtatctatctcattttctacaccttatt<br/>accttctgctctctgattggaaaaagctgaaaaaaagggtgaaaccagtt<br/>ccctgaaattattcccacttgactaataagtatataaagacggtaggtattga<br/>ttgtaattctgaaatctatttctaaacttctaaattctactttatagttagctttt<br/>tttagtttaaacaccaagaacttagttcgaataaacacacataaacaaca<br/>aaaacaaaatgagattccatctattttactgctgttttgctgcttctctgc<br/>ttggctgctccagttaatactactactgaagatgaaactgctcaattccagct<br/>gaagctgttattggtattctgattggagggtgactttgatgttgctgtttgcca<br/>tttctaacttactaacaacggtttgctattcatcaactactatcgttctatc<br/>gctgctaaagaagaaggttttcttggataaaagagaagaaggtgaaccaa<br/>aacatggtgaaggcacattcacatctgatctgtccaaacaaatggaggagg<br/>aagcggtagctttatttgaatggttaaaaaacgggggacctagctccggc<br/>gcgcccccccgagctaataaagtaagagcgtacattggtctaccttttctt<br/>ttacttaaacattagtttagttcgttttctttttttatgtttccccccaaagttc<br/>tgattttataatattttacacaattccatttaacagagggggaatagattct<br/>ttagcttagaaaattagtgatcaatataattgcctttctttcatctttcagtgat<br/>attaatggttcgagacactgcaatggccctactagtgctgaggcattaat</p> | (Hedin et al., 2022) |

**Supplementary Table S4. gRNA used in this study**

| gRNA | Sequence             | Reference            |
|------|----------------------|----------------------|
| URA3 | gagtaaaaaattgtacttgg | (Zhang et al., 2014) |
| HIS3 | ccctttaaagagatcgcaat | (Zhang et al., 2014) |
| TRP1 | gtcaattgttctctttctat | (Zhang et al., 2014) |
| THI2 | actacaattatctccatggt | This study           |
| THI6 | ttaaataaccataaaatgaa | This study           |
| SNO1 | gacgccttaattattcccgg | This study           |
| SNZ1 | acccaactgcattaacaatg | This study           |

|      |                      |            |
|------|----------------------|------------|
| BTS1 | ttgctgaggacattacagag | This study |
| REI1 | gaagatgactgggaagacgt | This study |

**Table S5. Strains used in this study**

| Strain                                                                       | Genotype                                                                                              | Marker | Parental strain                                  | Reference            |
|------------------------------------------------------------------------------|-------------------------------------------------------------------------------------------------------|--------|--------------------------------------------------|----------------------|
| Sb                                                                           |                                                                                                       | N/A    | SB-ATCC-796                                      | This study           |
| SbU <sup>-</sup>                                                             | Sb <i>URA3</i> <sup>S81X</sup>                                                                        | N/A    | Sb                                               | This study           |
| SbH <sup>-</sup>                                                             | Sb <i>HIS3</i> <sup>G26X</sup>                                                                        | N/A    | Sb                                               | This study           |
| SbT <sup>-</sup>                                                             | Sb <i>TRP1</i> <sup>P12X</sup>                                                                        | N/A    | Sb                                               | This study           |
| SbU <sup>-</sup> + <i>HIS3</i> <sup>G26X</sup>                               | Sb <i>URA3</i> <sup>S81X</sup> + <i>HIS3</i> <sup>G26X</sup>                                          | N/A    | SbU <sup>-</sup>                                 | This study           |
| SbH <sup>-</sup> + <i>TRP1</i> <sup>P12X</sup>                               | Sb <i>HIS3</i> <sup>G26X</sup> + <i>TRP1</i> <sup>P12X</sup>                                          | N/A    | SbH <sup>-</sup>                                 | This study           |
| SbU <sup>-</sup> + <i>HIS3</i> <sup>G26X</sup> + <i>TRP1</i> <sup>P12X</sup> | Sb <i>URA3</i> <sup>S81X</sup> + <i>HIS3</i> <sup>G26X</sup>                                          | N/A    | SbU <sup>-</sup> + <i>HIS3</i> <sup>G26X</sup>   | This study           |
| SbU <sup>-</sup> + <i>thi6</i> Δ                                             | Sb <i>URA3</i> <sup>S81X</sup> + <i>thi6</i> Δ                                                        | N/A    | SbU <sup>-</sup>                                 | This study           |
| SbU <sup>-</sup> + <i>thi2</i> Δ                                             | Sb <i>URA3</i> <sup>S81X</sup> + <i>thi2</i> Δ                                                        | N/A    | SbU <sup>-</sup>                                 | This study           |
| SbU <sup>-</sup> + <i>sno1</i> Δ                                             | Sb <i>URA3</i> <sup>S81X</sup> + <i>sno1</i> Δ                                                        | N/A    | SbU <sup>-</sup>                                 | This study           |
| SbU <sup>-</sup> + <i>snz1</i> Δ                                             | Sb <i>URA3</i> <sup>S81X</sup> + <i>snz1</i> Δ                                                        | N/A    | SbU <sup>-</sup>                                 | This study           |
| SbU <sup>-</sup> + <i>sno1</i> Δ + <i>snz1</i> Δ                             | Sb <i>URA3</i> <sup>S81X</sup> + <i>sno1</i> Δ + <i>snz1</i> Δ                                        | N/A    | SbU <sup>-</sup> + <i>sno1</i> Δ                 | This study           |
| SbU <sup>-</sup> + <i>rei1</i> Δ                                             | Sb <i>URA3</i> <sup>S81X</sup> + <i>rei1</i> Δ                                                        | N/A    | SbU <sup>-</sup>                                 | This study           |
| SbU <sup>-</sup> + <i>bts1</i> Δ                                             | Sb <i>URA3</i> <sup>S81X</sup> + <i>bts1</i> Δ                                                        | N/A    | SbU <sup>-</sup>                                 | This study           |
| SbU <sup>-</sup> + <i>bts1</i> Δ + <i>thi6</i> Δ                             | Sb <i>URA3</i> <sup>S81X</sup> + <i>bts1</i> Δ + <i>thi6</i> Δ                                        | N/A    | SbU <sup>-</sup> + <i>bts1</i> Δ                 | This study           |
| (SbU <sup>-</sup> )-Exe4                                                     | SbU <sup>-</sup> + XII-5 P <sub>TDH3</sub> -Exe4-t <sub>DIT1</sub> **                                 | N/A    | SbU <sup>-</sup>                                 | (Hedin et al., 2022) |
| (SbU <sup>-</sup> + <i>thi6</i> Δ)-Exe4                                      | SbU <sup>-</sup> + <i>thi6</i> Δ + XII-5 P <sub>TDH3</sub> -Exe4-t <sub>DIT1</sub> **                 | N/A    | SbU <sup>-</sup> + <i>thi6</i> Δ                 | This study           |
| (SbU <sup>-</sup> + <i>bts1</i> Δ)-Exe4                                      | SbU <sup>-</sup> + <i>bts1</i> Δ + XII-5 P <sub>TDH3</sub> -Exe4-t <sub>DIT1</sub> **                 | N/A    | SbU <sup>-</sup> + <i>bts1</i> Δ                 | This study           |
| (SbU <sup>-</sup> + <i>bts1</i> Δ + <i>thi6</i> Δ)-Exe4                      | SbU <sup>-</sup> + <i>bts1</i> Δ + <i>thi6</i> Δ + XII-5 P <sub>TDH3</sub> -Exe4-t <sub>DIT1</sub> ** | N/A    | SbU <sup>-</sup> + <i>bts1</i> Δ + <i>thi6</i> Δ | This study           |
| (SbU <sup>-</sup> )-GFP                                                      | SbU <sup>-</sup> + XII-5 P <sub>TDH3</sub> -yEGFP-t <sub>ADHI</sub>                                   | N/A    | SbU <sup>-</sup>                                 | This study           |
| (SbU <sup>-</sup> + <i>bts1</i> Δ + <i>thi6</i> Δ)-mKate                     | SbU <sup>-</sup> + <i>bts1</i> Δ + <i>thi6</i> Δ + XII-5 P <sub>TDH3</sub> -mKate-t <sub>ADHI</sub>   | N/A    | SbU <sup>-</sup> + <i>bts1</i> Δ + <i>thi6</i> Δ | This study           |

## Reference

- Hedin, K. A., Zhang, H., Kruse, V., Rees, V. E., Bäckhed, F., Greiner, T. U., Vazquez-Uribe, R., & Sommer, M. O. A. (2022). Oral delivery of GLP-1R agonist by an engineered probiotic yeast strain has anti-obesity effects in mice. *BioRxiv*, [Preprint]. <https://doi.org/10.1101/2022.12.21.521368>
- Jessop-Fabre, M. M., Jakočiūnas, T., Stovicek, V., Dai, Z., Jensen, M. K., Keasling, J. D., & Borodina, I. (2016). EasyClone-MarkerFree: A vector toolkit for marker-less integration of genes into *Saccharomyces cerevisiae* via CRISPR-Cas9. *Biotechnology Journal*, *11*(8), 1110–1117. <https://doi.org/10.1002/BIOT.201600147>
- Zhang, G. C., Kong, I. I., Kim, H., Liu, J. J., Cate, J. H. D., & Jin, Y. S. (2014). Construction of a quadruple auxotrophic mutant of an industrial polyploid *Saccharomyces cerevisiae* strain by using RNA-guided Cas9 nuclease. *Applied and Environmental Microbiology*, *80*(24), 7694–7701. [https://doi.org/10.1128/AEM.02310-14/SUPPL\\_FILE/ZAM999105872SO1.PDF](https://doi.org/10.1128/AEM.02310-14/SUPPL_FILE/ZAM999105872SO1.PDF)
